# Supplementary material for: The histone deacetylase inhibitor SAHA induces HSP60 nitration and its extracellular release by exosomal vesicles in human lung-derived carcinoma cells
Source: PubMed Central journal article supplement (PMC5045361; doi:10.18632/oncotarget.6680), 2015-12-19
Supplement: oncotarget-07-28849-s001.pdf [file oncotarget-07-28849-s001.pdf]

## SUPPLEMENTARY FIGURE

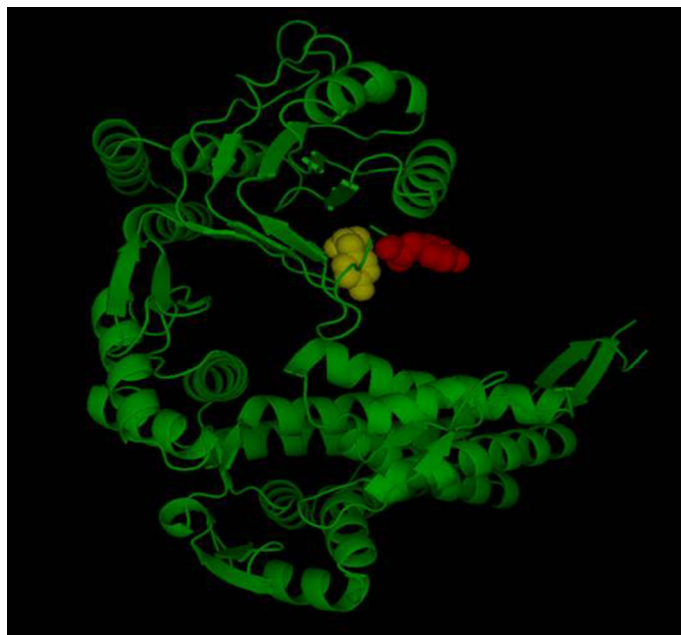

**Supplementary Figure S1: Three-dimensional model of HSP60 monomer.** Three-dimensional model of HSP60 monomer showing the positions Y222 (yellow) and Y226 (red) in the apical domain. This domain is crucial for co-chaperonin (HSP10) and substrate binding by HSP60.
